# Supplementary material for: Increasing coastal slump activity impacts the release of sediment and organic carbon into the Arctic Ocean
Source: Copernicus journal article supplement (doi:10.5194/bg-15-1483-2018), 2018-03-13
Supplement: Supplementary file 1 [file bg-15-1483-2018-supplement.zip]

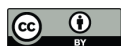

*Supplement of*

**Increasing coastal slump activity impacts the release of sediment and organic carbon into the Arctic Ocean**

**Justine L. Ramage et al.**

*Correspondence to:* Justine L. Ramage ([justine.ramage@awi.de](mailto:justine.ramage@awi.de))

- [bg-15-1483-2018-supplement-title-page.pdf](#)
- [S1\\_TableS1.xlsx](#)

The copyright of individual parts of the supplement might differ from the CC BY 4.0 License.
